# Supplementary material for: RSHSC-Routing Algorithm Based on Simplified Harmony Search and Coding for UWSNs
Source: Hindawi journal article supplement (doi:10.1155/2018/1091630), 2018-11-13
Supplement: f1 [file 1091630.f1.pdf]

The amount of data is too large in simulations. It is difficult to show the detailed raw data obtained by NS3 in this document. Therefore, the data need to be arranged.

### **Fig 9 Affection of different schemes**

N=number of nodes

(a) The delivery ratio in different cases

The data obtained by NS3 are arranged as follows:

Case 1

N=20

Sink: 3 receive : 121 packets

Source nodes send : 122 packets

N=25

Sink: 3 receive : 120 packets

Source nodes send : 122 packets

N=30

Sink: 3 receive : 121 packets

Source nodes send : 122 packets

N=35

Sink: 3 receive : 120 packets

Source nodes send : 122 packets

N=40

Sink: 3 receive : 120 packets

Source nodes send : 122 packets

N=45

Sink: 3 receive : 121 packets

Source nodes send : 122 packets

N=50

Sink: 3 receive : 121 packets

Source nodes send : 122 packets

N=55

Sink: 3 receive : 118 packets

Source nodes send : 122 packets

N=60

Sink: 3 receive : 120 packets

Source nodes send : 122 packets

N=65

Sink: 3 receive : 121 packets

Source nodes send : 122 packets

N=70

Sink: 3 receive : 121 packets

Source nodes send : 122 packets

N=75

Sink: 3 receive : 120 packets

Source nodes send : 122 packets

Case 2

N=20

Sink: 3 receive : 120 packets

Source nodes send : 122 packets

N=25

Sink: 3 receive : 118 packets

Source nodes send : 122 packets

N=30

Sink: 3 receive : 120 packets

Source nodes send : 122 packets

N=35

Sink: 3 receive : 121 packets

Source nodes send : 122 packets

N=40

Sink: 3 receive : 118 packets

Source nodes send : 122 packets

N=45

Sink: 3 receive : 117 packets

Source nodes send : 122 packets

N=50

Sink: 3 receive : 121 packets

Source nodes send : 122 packets

N=55

Sink: 3 receive : 118 packets

Source nodes send : 122 packets

N=60

Sink: 3 receive : 118 packets

Source nodes send : 122 packets

N=65

Sink: 3 receive : 120 packets

Source nodes send : 122 packets

N=70

Sink: 3 receive : 118 packets

Source nodes send : 122 packets

N=75

Sink: 3 receive : 120 packets

Source nodes send : 122 packets

Case 3

N=20

Sink: 3 receive : 120 packets

Source nodes send : 122 packets  
N=25  
Sink: 3 receive : 118 packets  
Source nodes send : 122 packets  
N=30  
Sink: 3 receive : 120 packets  
Source nodes send : 122 packets  
N=35  
Sink: 3 receive : 121 packets  
Source nodes send : 122 packets  
N=40  
Sink: 3 receive : 118 packets  
Source nodes send : 122 packets  
N=45  
Sink: 3 receive : 117 packets  
Source nodes send : 122 packets  
N=50  
Sink: 3 receive : 121 packets  
Source nodes send : 122 packets  
N=55  
Sink: 3 receive : 118 packets  
Source nodes send : 122 packets  
N=60  
Sink: 3 receive : 118 packets  
Source nodes send : 122 packets  
N=65  
Sink: 3 receive : 120 packets  
Source nodes send : 122 packets  
N=70  
Sink: 3 receive : 118 packets  
Source nodes send : 122 packets  
N=75  
Sink: 3 receive : 120 packets  
Source nodes send : 122 packets

#### Case 4

N=20  
Sink: receive : 117 packets  
Source nodes send : 122 packets  
N=25  
Sink: 3 receive : 118 packets  
Source nodes send : 122 packets  
N=30  
Sink: 3 receive : 116 packets

Source nodes send : 122 packets  
N=35  
Sink: 3 receive : 117 packets  
Source nodes send : 122 packets  
N=40  
Sink: 3 receive : 117 packets  
Source nodes send : 122 packets  
N=45  
Sink: 3 receive : 116 packets  
Source nodes send : 122 packets  
N=50  
Sink: 3 receive : 113 packets  
Source nodes send : 122 packets  
N=55  
Sink: 3 receive : 112 packets  
Source nodes send : 122 packets  
N=60  
Sink: 3 receive : 110 packets  
Source nodes send : 122 packets  
N=65  
Sink: 3 receive : 111 packets  
Source nodes send : 122 packets  
N=70  
Sink: 3 receive : 109 packets  
Source nodes send : 122 packets  
N=75  
Sink: 3 receive : 107 packets  
Source nodes send : 122 packets

The results are shown using MATLAB as follows:

```
x=[20,25,30,35,40,45,50,55,60,65,70,75];
y1=[0.99,0.98,0.99,0.98,0.98,0.99,0.99,0.97,0.98,0.99,0.99,0.98];
y2=[0.98,0.97,0.98,0.99,0.97,0.96,0.96,0.97,0.97,0.98,0.97,0.98];
y3=[0.96,0.97,0.97,0.95,0.96,0.95,0.93,0.92,0.90,0.91,0.89,0.88];
y4=[0.94,0.95,0.92,0.93,0.91,0.92,0.92,0.91,0.90,0.89,0.87,0.87];
```

The results are shown using MATLAB as follows:

```
plot(x,y1,'-o',x,y2,'-+',x,y3,'-x',x,y4,'->');
legend('case 1','case2','case3','case 4');
xlabel('number of nodes');
```

```
ylabel('delivery ratio');
axis([20 75 0.6 1.2])
h = gca;
set(h,'FontSize',20)
```

(b) The network life ratio

T=The performing time until the first node drains its energy

The data obtained by NS3 are arranged as follows:

Case 1

N=20

T=15360000000000.0ns node 14 drains its energy

N=25

T= 15720000000000.0ns node 21 drains its energy

N=30

T= 15840000000000.0ns node 28 drains its energy

N=35

T= 16200000000000.0ns node 31 drains its energy

N=40

T= 15960000000000.0ns node 19 drains its energy

N=45

T= 16200000000000.0ns node 23 drains its energy

N=50

T= 15960000000000.0ns node 36 drains its energy

N=55

T= 19800000000000.0ns node 45 drains its energy

N=60

T= 15720000000000.0ns node 24 drains its energy

N=65

T= 15840000000000.0ns node 38 drains its energy

N=70

T= 15720000000000.0ns node 44 drains its

energy

N=75

T= 15840000000000.0ns node 23 drains its energy

Case 2

N=20

T= 16080000000000.0ns node 13 drains its energy

N=25

T= 15840000000000.0ns node 22 drains its energy

N=30

T= 16080000000000.0ns node 24 drains its energy

N=35

T= 16200000000000.0ns node 35 drains its energy

N=40

T= 15960000000000.0ns node 40 drains its energy

N=45

T= 16200000000000.0ns node 23 drains its energy

N=50

T= 15840000000000.0ns node 22 drains its energy

N=55

T= 16200000000000.0ns node 15 drains its energy

N=60

T= 15960000000000.0ns node 35 drains its energy

N=65

T= 15720000000000.0ns node 45 drains its energy

N=70

T= 16080000000000.0ns node 54 drains its energy

N=75

T= 16080000000000.0ns node 28 drains its energy

Case 3

N=20

T= 1200000000000.0ns node 11 drains its  
 energy  
 N=25  
 T= 12120000000000.0ns node 18 drains its  
 energy  
 N=30  
 T= 11760000000000.0ns node 22 drains its  
 energy  
 N=35  
 T= 11520000000000.0ns node 19 drains its  
 energy  
 N=40  
 T= 11640000000000.0ns node 24 drains its  
 energy  
 N=45  
 T= 11520000000000.0ns node 34 drains its  
 energy  
 N=50  
 T= 114000000000.0ns node 21 drains its energy  
 N=55  
 T= 10920000000000.0ns node 17 drains its  
 energy  
 N=60  
 T= 10800000000000.0ns node 45 drains its  
 energy  
 N=65  
 T= 10680000000000.0ns node 52 drains its  
 energy  
 N=70  
 T= 10440000000000.0ns node 42 drains its  
 energy  
 N=75  
 T= 10560000000000.0ns node 34 drains its  
 energy  
 Case 4  
 N=20  
 T= 13200000000000.0ns node 15 drains its  
 energy  
 N=25  
 T= 12000000000000.0ns node 21 drains its  
 energy  
 N=30  
 T= 11880000000000.0ns node 25 drains its  
 energy

N=35  
 T= 11640000000000.0ns node 29 drains its  
 energy  
 N=40  
 T= 11640000000000.0ns node 24 drains its  
 energy  
 N=45  
 T= 11520000000000.0ns node 37 drains its  
 energy  
 N=50  
 T= 111600000000.0ns node 27 drains its energy  
 N=55  
 T= 10920000000000.0ns node 17 drains its  
 energy  
 N=60  
 T= 10800000000000.0ns node 47 drains its  
 energy  
 N=65  
 T= 10800000000000.0ns node 59 drains its  
 energy  
 N=70  
 T= 10560000000000.0ns node 18 drains its  
 energy  
 N=75  
 T= 10560000000000.0ns node 34 drains its  
 energy  
 The results are shown using MATLAB as  
 follows:  
 x=[20,25,30,35,40,45,50,55,60,65,70,75];  
 y1=[1.28,1.31,1.32,1.35,1.33,1.35,1.33,1.32,1.31  
 ,1.32,1.31,1.32];  
 y2=[1.34,1.32,1.34,1.35,1.33,1.35,1.32,1.34,1.33  
 ,1.31,1.34,1.336];  
 y3=[1,1.01,0.98,0.96,0.97,0.96,0.95,0.91,0.90,0.  
 89,0.87,0.878];  
 y4=[1.1,1.0,0.99,0.97,0.96,0.95,0.93,0.91,0.90,0.  
 90,0.88,0.88];  
 plot(x,y1,'-o',x,y2,'-+',x,y3,'-x',x,y4,'->');  
 legend('case 1','case2','case3','case 4');  
 xlabel('number of nodes');  
 ylabel('network life ratio');  
 axis([20 75 0.8 1.5])  
 h = gca;  
 set(h,'FontSize',20)

**Fig 10 The affection of number ratio of regular nodes to advanced nodes(RRTA)**

The data obtained by NS3 are arranged as follows:

N=2

RRTA=2.5 T= 1600000000000.0ns node 38 drains its energy

RRTA=3 T= 1616000000000.0ns node 43 drains its energy

RRTA=3.5 T= 1584000000000.0ns node 52 drains its energy

RRTA=4 T= 1584000000000.0ns node 55 drains its energy

RRTA=4.5 T= 1604800000000.0ns node 24 drains its energy

RRTA=5 T= 1593600000000.0ns node 18 drains its energy

RRTA=5.5 T= 1593600000000.0ns node 14 drains its energy

RRTA=6 T= 1408000000000.0ns node 5 drains its energy

RRTA=6.5 T= 1248000000000.0ns node 7 drains its energy

N=3

RRTA=2.5 T= 1600000000000.0ns node 36 drains its energy

RRTA=3 T= 1616000000000.0ns node 53 drains its energy

RRTA=3.5 T= 1584000000000.0ns node 62 drains its energy

RRTA=4 T= 1472000000000.0ns node 65 drains its energy

RRTA=4.5 T= 1424000000000.0ns node 44 drains its energy

RRTA=5 T= 1384000000000.0ns node 23 drains its energy

RRTA=5.5 T= 1296000000000.0ns node 18 drains its energy

RRTA=6 T= 1248000000000.0ns node 11 drains its energy

RRTA=6.5 T= 1040000000000.0ns node 5 drains its energy

N=4

RRTA=2.5 T= 1568000000000.0ns node 43 drains its energy

RRTA=3 T= 1536000000000.0ns node 23 drains its energy

RRTA=3.5 T= 1440000000000.0ns node 7 drains its energy

RRTA=4 T= 1360000000000.0ns node 10 drains its energy

RRTA=4.5 T= 1280000000000.0ns node 8 drains its energy

RRTA=5 T= 1216000000000.0ns node 5 drains its energy

RRTA=5.5 T= 1120000000000.0ns node 7 drains its energy

RRTA=6 T= 1040000000000.0ns node 9 drains its energy

RRTA=6.5 T= 992000000000.0ns node 5 drains its energy

N=5

RRTA=2.5 T= 1456000000000.0ns node 60 drains its energy

RRTA=3 T= 1440000000000.0ns node 45 drains its energy

RRTA=3.5 T= 1440000000000.0ns node 58 drains its energy

RRTA=4 T= 1312000000000.0ns node 10 drains its energy

RRTA=4.5 T= 1072000000000.0ns node 12 drains its energy

RRTA=5 T= 960000000000.0ns node 8 drains its energy

RRTA=5.5 T= 848000000000.0ns node 9 drains its energy

RRTA=6.5 T= 768000000000.0ns node 5 drains its energy

The results are shown use MATLAB as follows:

x=[2.5,3,3.5,4,4.5,5,5.5,6,6.5];

y1=[1,1.01,0.99,0.992,1.003,0.996,0.996,0.88,0.78];

y2=[1,1.01,0.99,0.92,0.89,0.865,0.81,0.78,0.72];

y3=[0.98,0.96,0.90,0.85,0.80,0.76,0.70,0.65,0.62

```

];
y4=[0.91,0.9,0.82,0.78,0.67,0.60,0.53,0.50,0.48]
;
plot(x,y1,'-o',x,y2,'-+',x,y3,'-x',x,y4,'->');
legend('N=2','N=3','N=4','N=5');
xlabel('number ratio of regular nodes to cluster heads ');
ylabel('network life ratio');
axis([2.5 6.5 0.5 1.2])
h = gca
set(h,'FontSize',20)

```

**Fig 11 Comparison with NCRP and VBF**

N=number of nodes

1. End-to-end delay

t=the average end to end delay

**RSHSC**

N=20From the sender to the receiver is 1010000000.0ns

N=25From the sender to the receiver is 1000000000.0ns

N=30From the sender to the receiver is 1050000000.0ns

N=35From the sender to the receiver is 990000000.0ns

N=40From the sender to the receiver is 980000000.0ns

N=45From the sender to the receiver is 1000000000.0ns

N=50From the sender to the receiver is 1010000000.0ns

N=55From the sender to the receiver is 970000000.0ns

N=60From the sender to the receiver is 950000000.0ns

N=65From the sender to the receiver is 1000000000.0ns

N=70From the sender to the receiver is 1060000000.0ns

N=75From the sender to the receiver is 1000000000.0ns

**VBF**

N=20From the sender to the receiver is 14010000000.0ns

N=25From the sender to the receiver is 12000000000.0ns

N=30From the sender to the receiver is 16050000000.0ns

N=35From the sender to the receiver is 10400000000.0ns

N=40From the sender to the receiver is 12000000000.0ns

N=45From the sender to the receiver is 14000000000.0ns

N=50From the sender to the receiver is 13000000000.0ns

N=55From the sender to the receiver is 14000000000.0ns

N=60From the sender to the receiver is 12000000000.0ns

N=65From the sender to the receiver is 13000000000.0ns

N=70From the sender to the receiver is 14060000000.0ns

N=75From the sender to the receiver is 13000000000.0ns

**NCRP**

N=20From the sender to the receiver is 1000000000.0ns

N=25From the sender to the receiver is 11400000000.0ns

N=30From the sender to the receiver is 1100000000.0ns

N=35From the sender to the receiver is 1000000000.0ns

N=40From the sender to the receiver is 1100000000.0ns

N=45From the sender to the receiver is 900000000.0ns

N=50From the sender to the receiver is 950000000.0ns

N=55From the sender to the receiver is 960000000.0ns

N=60From the sender to the receiver is  
950000000.0ns

N=65From the sender to the receiver is  
1010000000.0ns

N=70From the sender to the receiver is  
1020000000.0ns

N=75From the sender to the receiver is  
980000000.0ns

The results are shown using MATLAB as  
follows:

```
x=[20,25,30,35,40,45,50,55,60,65,70,75];  
y1=[1.01,1.0,1.05,0.99,0.98,1.0,1.01,0.97,0.95,1.  
0,1.06,1.0];  
y2=[14,12,14,16,12,14,13,14,12,13,14,13];  
y3=[1,1.14,1.1,1,1.1,0.9,0.95,0.96,1.01,1.02,1.05  
,0.98];  
plot(x,y1,'-o',x,y2,'-+',x,y3,'-x');  
legend('RSHSC','VBF','NCRP');  
xlabel('number of nodes');  
ylabel('end-to-end delay');  
axis([20 75 0 18])  
h = gca;  
set(h,'FontSize',20)
```

## 2. Consumption energy per packets

### RSHSC

N=20

Sink: 3 receive : 121 packets

Average Energy Consumption of each  
node1920J

N=25

Sink: 3 receive : 120 packets

Average Energy Consumption of each  
node2040J

N=30

Sink: 3 receive : 121 packets

Average Energy Consumption of each  
node1936J

N=35

Sink: 3 receive : 120 packets

Average Energy Consumption of each  
node2160J

N=40

Sink: 3 receive : 120 packets

Average Energy Consumption of each  
node1800J

N=45

Sink: 3 receive : 121 packets

Average Energy Consumption of each  
node2057J

N=50

Sink: 3 receive : 121 packets

Average Energy Consumption of each  
node1815J

N=55

Sink: 3 receive : 118packets

Average Energy Consumption of each  
node1888J

N=60

Sink: 3 receive : 120 packets

Average Energy Consumption of each  
node1800J

N=65

Sink: 3 receive : 121 packets

Average Energy Consumption of each  
node2057J

N=70

Sink: 3 receive : 121 packets

Average Energy Consumption of each  
node2057J

N=75

Sink: 3 receive : 120 packets

Average Energy Consumption of each  
node1920J

### VBF

N=20

Sink: 3 receive :61 packets

Average Energy Consumption of each  
node4026J

N=25

Sink: 3 receive :61 packets

Average Energy Consumption of each  
node4575J

N=30

Sink: 3 receive :95packets  
Average Energy Consumption of each node  
5700J  
N=35  
Sink: 3 receive :87 packets  
Average Energy Consumption of each node  
5916J  
N=40  
Sink: 3 receive :89 packets  
Average Energy Consumption of each node  
6408J  
N=45  
Sink: 3 receive :90 packets  
Average Energy Consumption of each node  
7380J  
N=50  
Sink: 3 receive :99 packets  
Average Energy Consumption of each node  
8811J  
N=55  
Sink: 3 receive :101packets  
Average Energy Consumption of each node  
9595J  
N=60  
Sink: 3 receive :104 packets  
Average Energy Consumption of each node  
10608J  
N=65  
Sink: 3 receive :102 packets  
Average Energy Consumption of each node  
11832J  
N=70  
Sink: 3 receive :104 packets  
Average Energy Consumption of each node  
12064J  
N=75  
Sink: 3 receive :105 packets  
Average Energy Consumption of each node  
12705J  
  
NCRP  
  
N=20  
Sink: 3 receive : 121 packets

Average Energy Consumption of each node  
1936J  
N=25  
Sink: 3 receive : 121 packets  
Average Energy Consumption of each node  
2057J  
N=30  
Sink: 3 receive : 121 packets  
Average Energy Consumption of each node  
1936J  
N=35  
Sink: 3 receive : 120 packets  
Average Energy Consumption of each node  
2160J  
N=40  
Sink: 3 receive : 121 packets  
Average Energy Consumption of each node  
1815J  
N=45  
Sink: 3 receive : 121 packets  
Average Energy Consumption of each node  
2057J  
N=50  
Sink: 3 receive : 121 packets  
Average Energy Consumption of each node  
1815J  
N=55  
Sink: 3 receive :120packets  
Average Energy Consumption of each node  
1920J  
N=60  
Sink: 3 receive : 120 packets  
Average Energy Consumption of each node  
1800J  
N=65  
Sink: 3 receive : 121 packets  
Average Energy Consumption of each node  
2057J  
N=70  
Sink: 3 receive : 121 packets  
Average Energy Consumption of each node  
2057J  
N=75  
Sink: 3 receive : 120 packets

Average Energy Consumption of each node  
1920J

The results are shown using MATLAB as follows:

```
x=[20,25,30,35,40,45,50,55,60,65,70,75];  
y1=[16,17,16,18,15,17,15,16,15,17,17,16];  
y2=[66,75,60,68,72,82,89,95,102,110,116,121];  
y3=[18,20,21,23,22,19,22,23,21,20,22,21];  
plot(x,y1,'-o',x,y2,'-+',x,y3,'-x');  
legend('RSHSC','VBF','NCRP');  
xlabel('number of nodes');  
ylabel('total energy consumption(J)/ packets');  
axis([20 75 10 130])  
h = gca;  
set(h,'FontSize',20)
```

### 3. Delivery ratio

RSHSC

N=20

Sink: 3 receive : 121 packets

Source nodes send : 122 packets

N=25

Sink: 3 receive : 121 packets

Source nodes send : 122 packets

N=30

Sink: 3 receive : 121 packets

Source nodes send : 122 packets

N=35

Sink: 3 receive : 120 packets

Source nodes send : 122 packets

N=40

Sink: 3 receive : 121 packets

Source nodes send : 122 packets

N=45

Sink: 3 receive : 121 packets

Source nodes send : 122 packets

N=50

Sink: 3 receive : 121 packets

Source nodes send : 122 packets

N=55

Sink: 3 receive : 120 packets

Source nodes send : 122 packets

N=60

Sink: 3 receive : 120 packets

Source nodes send : 122 packets

N=65

Sink: 3 receive : 121 packets

Source nodes send : 122 packets

N=70

Sink: 3 receive : 121 packets

Source nodes send : 122 packets

N=75

Sink: 3 receive : 120 packets

Source nodes send : 122 packets

VBF

N=20

Sink: 3 receive : 61 packets

Source nodes send : 122 packets

N=25

Sink: 3 receive : 61 packets

Source nodes send : 122 packets

N=30

Sink: 3 receive : 95 packets

Source nodes send : 122 packets

N=35

Sink: 3 receive : 87 packets

Source nodes send : 122 packets

N=40

Sink: 3 receive : 89 packets

Source nodes send : 122 packets

N=45

Sink: 3 receive : 90 packets

Source nodes send : 122 packets

N=50

Sink: 3 receive : 99 packets

Source nodes send : 122 packets

N=55

Sink: 3 receive : 101 packets

Source nodes send : 122 packets

N=60

Sink: 3 receive : 104 packets

Source nodes send : 122 packets

N=65

Sink: 3 receive : 102 packets

Source nodes send : 122 packets

N=70

Sink: 3 receive :104 packets  
 Source nodes send : 122 packets  
 N=75  
 Sink: 3 receive :105 packets  
 Source nodes send : 122 packets  
  
 NCRP  
  
 N=20  
 Sink: 3 receive :120 packets  
 Source nodes send : 122 packets  
 N=25  
 Sink: 3 receive :119 packets  
 Source nodes send : 122 packets  
 N=30  
 Sink: 3 receive :119 packets  
 Source nodes send : 122 packets  
 N=35  
 Sink: 3 receive :119 packets  
 Source nodes send : 122 packets  
 N=40  
 Sink: 3 receive :120 packets  
 Source nodes send : 122 packets  
 N=45  
 Sink: 3 receive :119 packets  
 Source nodes send : 122 packets  
 N=50  
 Sink: 3 receive :119 packets  
 Source nodes send : 122 packets  
 N=55  
 Sink: 3 receive :120 packets  
 Source nodes send : 122 packets  
 N=60  
 Sink: 3 receive :119 packets  
 Source nodes send : 122 packets  
 N=65  
 Sink: 3 receive :120 packets  
 Source nodes send : 122 packets  
 N=70  
 Sink: 3 receive :120 packets  
 Source nodes send : 122 packets  
 N=75  
 Sink: 3 receive :121 packets  
 Source nodes send : 122 packets

The results are shown using MATLAB as follows:

```

x=[20,25,30,35,40,45,50,55,60,65,70,75];
y1=[0.99,0.99,0.99,0.98,0.99,0.99,0.99,0.98,0.98,0.99,0.99,0.98];
y2=[0.5,0.5,0.78,0.71,0.73,0.74,0.81,0.83,0.85,0.84,0.85,0.86];
y3=[0.98,0.97,0.97,0.97,0.98,0.97,0.97,0.98,0.97,0.98,0.97,0.99];
plot(x,y1,'-o',x,y2,'-+',x,y3,'-x');
legend('RSHSC','VBF','NCRP');
xlabel('number of nodes');
ylabel('delivery ratio');
axis([20 75 0.6 1.2])
h = gca;
set(h,'FontSize',20)
  
```
